# Supplementary material
Source: PubMed Central journal article supplement (PMC4621312)
Supplement: EC.00123-15_zek999094489so1.pdf [file EC.00123-15_zek999094489so1.pdf]

## Supplemental data

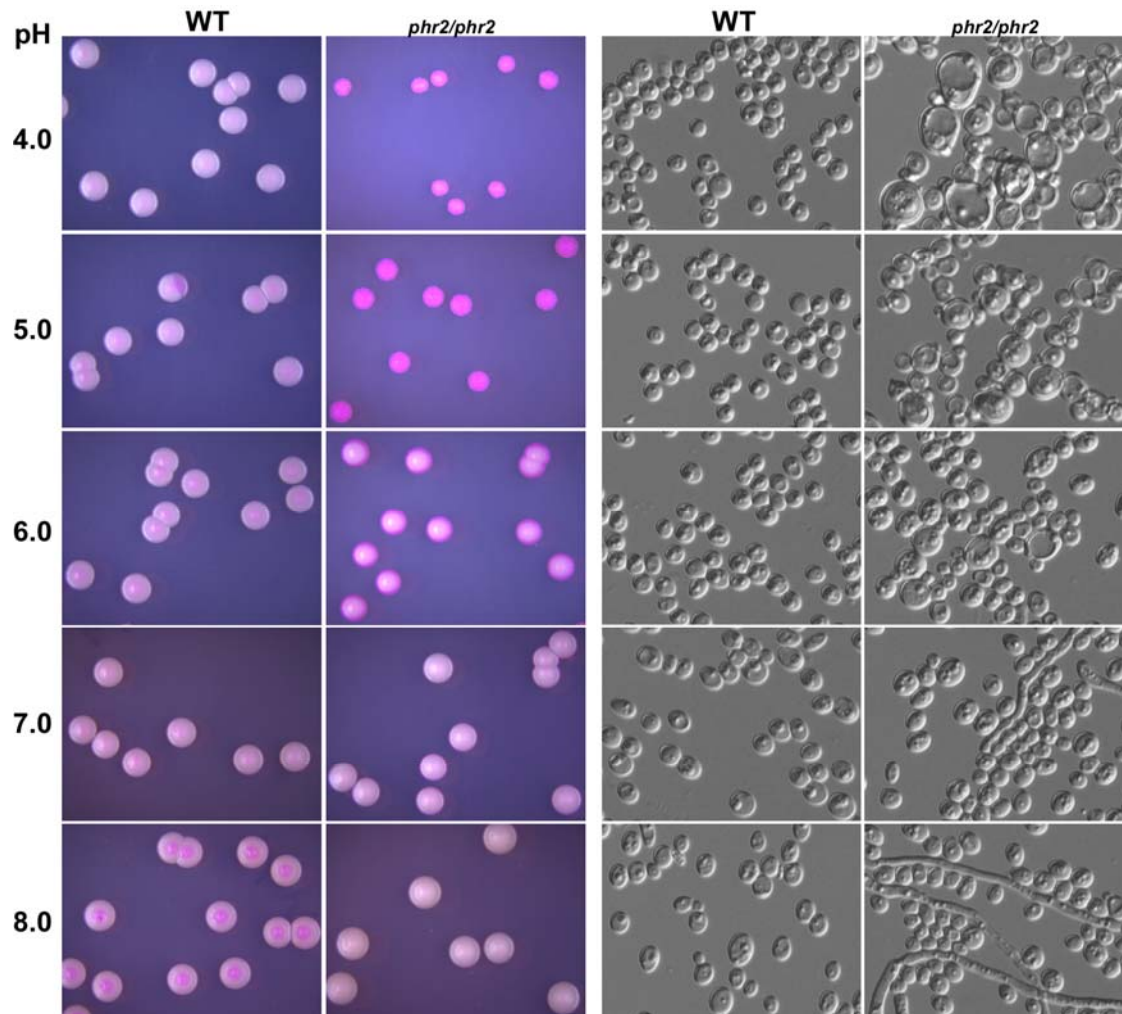

**Figure S1. Colony and cellular images of the white phenotype of the WT and *phr2/phr2* mutant under different pH conditions.** The parent strain GH1013 served as the control. White cells were plated onto Lee's glucose medium plates and incubated at 25°C for five days.

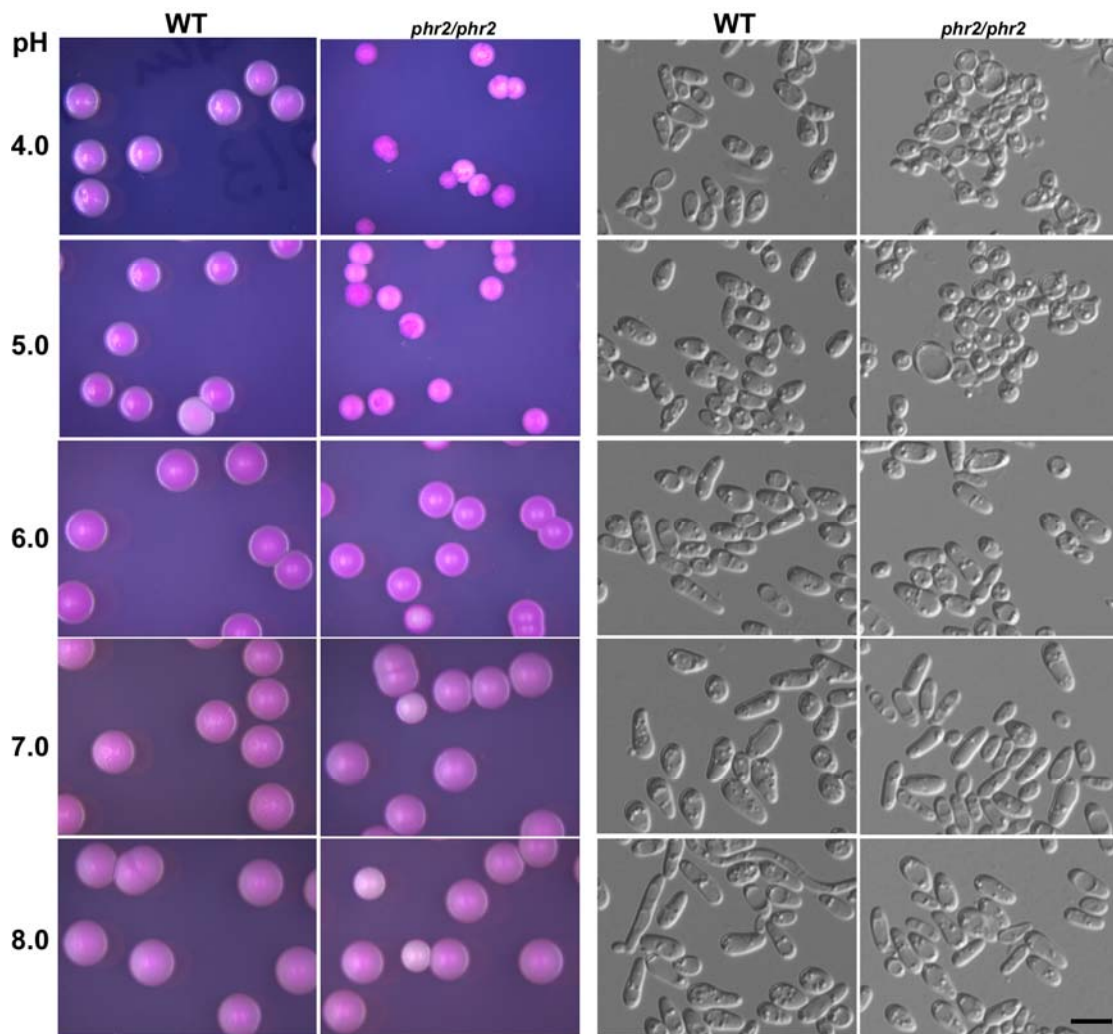

**Figure S2. Colony and cellular images of the opaque phenotype of the WT and *phr2/phr2* mutant under different pH conditions.** The parent strain GH1013 served as the control. Opaque cells were plated onto Lee's glucose medium plates and incubated at 25°C for five days.

**Table S1. Strains used in this study**

| Strain name        | Parent strain | Genotype                                                                 | Reference  |
|--------------------|---------------|--------------------------------------------------------------------------|------------|
| GH1349             | WUM5A         | <i>MTLa/α ura3::FRT/ura3::FRT arg4::dpl200/ arg4::dpl200-URA3-dpl200</i> | (1)        |
| P37005             |               | Clinical isolate, <i>MTLa/a</i>                                          | (2)        |
| GH1012             | CAI4          | As CAI4, but <i>MTLa/a</i>                                               | (3)        |
| GH1013             | BWP17         | As BWP17, but <i>MTLa/a</i>                                              | (3)        |
| WO-1<br>(FC4)      |               | Clinical isolate, <i>MTLa/α</i>                                          | (3, 4)     |
| SN250α             | SN250         | As SN250, but <i>MTLa/α</i>                                              | (5)        |
| 12C                |               | Clinical isolate, <i>MTLa/a</i>                                          | (2)        |
| <i>GH1120</i>      | CAN52         | As CAN52, but <i>MTLa/mtla::dpl200</i>                                   | (3)        |
| <i>GH1352</i>      | GH1349        | As GH1349, but <i>arg4::dpl200/ arg4::dpl200</i>                         | This study |
| <i>cyr1/cyr1</i>   | GH1352        | As GH1352, but <i>cyr1:arg4/cyr1::URA3</i>                               | This study |
| <i>pde2/pde2</i>   | WUM5A         | As WUM5A, but <i>pde2::dpl200/pde2::dpl200</i>                           | (6)        |
| <i>WUM5A</i>       | WO-1          | As WO-1, but <i>ura3::FRT/ura3::FRT</i>                                  | (7)        |
| <i>CAR2</i>        | CAI4          | As CAI4, <i>rim101::hisG/ rim101::hisG-URA3-hisG</i>                     | (8)        |
| <i>CAR2a</i>       | <i>CAR2</i>   | As <i>CAR2</i> , but <i>MTLa/ mtlα::FRT-SAT1-FRT</i>                     | This study |
| <i>phr1/phr1-2</i> | GH1013        | As GH1013, but <i>mfa1::ARG4/mfa1::HIS1</i>                              | This study |
| <i>phr2/phr2-2</i> | GH1013        | As GH1013, but <i>mfa1::ARG4/mfa1::HIS1</i>                              | This study |
| <i>SZ306u-a</i>    | <i>SZ306u</i> | As <i>SZ306u</i> , but <i>MTLa/mtlα::FRT-SAT1-FRT</i>                    | (9)        |
| GH1600             | <i>SZ306a</i> | As <i>SZ306a</i> , but <i>MFA1/MFA1::MFA1p-GFP</i>                       | (9)        |
| <i>SZ306u</i>      | <i>SZ306</i>  | As <i>SZ306</i> , but <i>ura3::FRT/ura3::FRT</i>                         | (9)        |
| GH1349a            | GH1349        | As GH1349 but <i>arg4::dpl200/ arg4::dpl200 -URA3-dpl200::CaARG4</i>     | This study |
| <i>ste11/ste11</i> | SC5314        | As SC5314, but <i>ste11::FRT/ ste11::FRT MTLa/mtlα::FRT</i>              | (9)        |
| GH1613             | JKC131        | As JKC131, but <i>MTLa/mtlα::FRT</i>                                     | (9)        |

## References

1. **Tao L, Du H, Guan G, Dai Y, Nobile CJ, Liang W, Cao C, Zhang Q, Zhong J, Huang G.** 2014. Discovery of a "white-gray-opaque" tristable phenotypic switching system in *Candida albicans*: roles of non-genetic diversity in host adaptation. *PLoS Biol* **12**:e1001830.
2. **Lockhart SR, Pujol C, Daniels KJ, Miller MG, Johnson AD, Pfaller MA, Soll DR.** 2002. In *Candida albicans*, white-opaque switchers are homozygous for mating type. *Genetics* **162**:737-745.
3. **Huang G, Srikantha T, Sahni N, Yi S, Soll DR.** 2009. CO(2) regulates white-to-opaque switching in *Candida albicans*. *Curr Biol* **19**:330-334.
4. **Slutsky B, Staebell M, Anderson J, Risen L, Pfaller M, Soll DR.** 1987. "White-opaque

- transition": a second high-frequency switching system in *Candida albicans*. *J Bacteriol* **169**:189-197.
5. **Guan G, Xie J, Tao L, Nobile CJ, Sun Y, Cao C, Tong Y, Huang G.** 2013. Bcr1 plays a central role in the regulation of opaque cell filamentation in *Candida albicans*. *Mol Microbiol* **89**:732-750.
  6. **Huang G, Yi S, Sahni N, Daniels KJ, Srikantha T, Soll DR.** 2010. N-acetylglucosamine induces white to opaque switching, a mating prerequisite in *Candida albicans*. *PLoS Pathog* **6**:e1000806.
  7. **Park YN, Morschhauser J.** 2005. Tetracycline-inducible gene expression and gene deletion in *Candida albicans*. *Eukaryot Cell* **4**:1328-1342.
  8. **Ramon AM, Porta A, Fonzi WA.** 1999. Effect of environmental pH on morphological development of *Candida albicans* is mediated via the PacC-related transcription factor encoded by PRR2. *J Bacteriol* **181**:7524-7530.
  9. **Tao L, Cao C, Liang W, Guan G, Zhang Q, Nobile CJ, Huang G.** 2014. White cells facilitate opposite- and same-sex mating of opaque cells in *Candida albicans*. *PLoS Genet* **10**:e1004737.

**Table S2. Primers used in this study**

| Name       | Sequence (5' to 3')                             | Purpose                                                                                      |
|------------|-------------------------------------------------|----------------------------------------------------------------------------------------------|
| Marker-F   | CCGCTGCTAGGCGCGCCGTGACCAGTGTGATG<br>GATATCTGC   | Amplification for<br><i>ARG4, HIS1, LEU2,</i><br><i>URA3</i> fragments<br>used in fusion PCR |
| Marker-R   | GCAGGGATGCGGCCGCTGACAGCTCGGATCCA<br>CTAGTAACG   |                                                                                              |
| PHR1-L FWD | CATAACTCTAACGATTCCA                             | Fusion PCR for<br><i>PHR1</i> KO                                                             |
| PHR1-L REV | GTCAGCGGCCGCATCCCTGC-TATCTAACTGGAG<br>TGTATAAG  |                                                                                              |
| PHR1-R FWD | CACGGCGCGCCTAGCAGCGG-GTTCTGTTGTATA<br>GGAC      |                                                                                              |
| PHR1-R REV | TACTTGGGATAAGGAGAG                              |                                                                                              |
| PHR1-CHF   | TCGGCTAAGTATTGTAATGGC                           | <i>PHR1</i> KO check<br>(first copy)                                                         |
| PHR1-CHR   | GGACAATGTTTCGTGATGATGA                          |                                                                                              |
| PHR1-orf-F | TACATTGTTGCTGATTTATC                            | <i>PHR1</i> KO check<br>(second copy)                                                        |
| PHR1-orf-R | GCAATCGATATAACCAC                               |                                                                                              |
| PHR2-L FWD | AGTCAATGAGATGGGAAG                              | Fusion PCR for<br><i>PHR2</i> KO                                                             |
| PHR2-L REV | GTCAGCGGCCGCATCCCTGC-TACAATTCTGCTA<br>CTGTTG    |                                                                                              |
| PHR2-R FWD | CACGGCGCGCCTAGCAGCGG-<br>ACTCCTTGTTTAAACAATTCC  |                                                                                              |
| PHR2-R REV | AGTATTATGCCACCACTAGT                            |                                                                                              |
| PHR2-CHF   | ACGATTGAGGAGTGACGA                              | <i>PHR2</i> KO check<br>(first copy)                                                         |
| PHR2-CHR   | CCTTGGTGGAAATCCTTGAT                            |                                                                                              |
| PHR2-orf-F | AGATACACTTCTGTTGTGC                             | <i>PHR2</i> KO check<br>(second copy)                                                        |
| PHR2-orf-R | TACTACCACTTGAACCAGA                             |                                                                                              |
| RAS1-L FWD | CAGAATTGCATTTCTCCGATC                           | Fusion PCR for<br><i>RAS1</i> KO                                                             |
| RAS1-L REV | CACGGCGCGCCTAGCAGCGGTGAAGAAGGAAA<br>AACAGACGAG  |                                                                                              |
| RAS1-R FWD | GTCAGCGGCCGCATCCCTGCACATTCAACATCCT<br>CTTCATACC |                                                                                              |
| RAS1-R REV | ATACTATATCAGCTCAACCTCG                          |                                                                                              |
| RAS1-CHF   | TCCTCCTCCATATTTCACTTTATC                        | <i>RAS1</i> KO check<br>(first copy)                                                         |
| RAS1-CHR   | TTCTTCTTCTCCACAACAAC                            |                                                                                              |

|                                                           |                                                 |                                                           |                                              |
|-----------------------------------------------------------|-------------------------------------------------|-----------------------------------------------------------|----------------------------------------------|
| RAS1-orf-F                                                | AAGAATATCTGGCCATGAGAG                           | <i>RAS1</i> KO check<br>(second copy)                     |                                              |
| RAS1-orf-R                                                | ACCACCATTAACAGCACTAG                            |                                                           |                                              |
| MFA1-RT-F                                                 | ATGGCTGCTCAACAACAATC                            | Quantitative real time<br>PCR                             |                                              |
| MFA1-RT-R                                                 | AACAGAACAAGTGGAACAGC                            |                                                           |                                              |
| MF $\alpha$ 1-RT-F                                        | TGACAGTAACCAAGTTGTTG                            |                                                           |                                              |
| MF $\alpha$ 1-RT-R                                        | AGCACCAGAGGTAAGAGTAG                            |                                                           |                                              |
| STE2-RT-F                                                 | TACTGGTTGGTATGATGGATC                           |                                                           |                                              |
| STE2-RT-R                                                 | AAGGCAACAACAATCAATCC                            |                                                           |                                              |
| GFP-RT-F                                                  | AGACACAACATTGAAGATGG                            |                                                           |                                              |
| GFP-RT-R                                                  | AGCAGCTGTTACAAACTCAAG                           |                                                           |                                              |
| For the construction of <i>CYR1</i> -reconstituted strain |                                                 |                                                           |                                              |
| LWH105                                                    | ACAAGCGGAAGAGTATGAATG                           |                                                           | <i>CYR1</i> promoter<br>region amplification |
| LWH106                                                    | CTTCCTAACATTCTCAACTTCATTTAAATTGAGAATGAA<br>TGGT |                                                           |                                              |
| LWH107                                                    | ACCATTCACTCTCAATTTAAATGAAGTTGAGAATGTTA<br>GGAAG | <i>CYR1</i> catalyzed<br>domain sequence<br>amplification |                                              |
| LWH108                                                    | AACGACAACTATATATGTATCTATCATTGTATGAAAAA<br>TTCAA |                                                           |                                              |
| LWH109                                                    | TTGAATTTTTCATACAATGATAGATACATATATAGTTGT<br>CGTT | <i>CYR1</i> terminator<br>amplification                   |                                              |
| LWH110                                                    | CACGGCGCGCCTAGCAGCGGATGCAGTTGTCATTGAAG<br>CT    |                                                           |                                              |
| LWH111                                                    | GTCAGCGGCCGCATCCCTGCATGATGATGGTTATGTTG<br>GA    | <i>CYR1</i> 3-UTR<br>amplification                        |                                              |
| LWH112                                                    | CGAACTATTTGTGACGCAT                             |                                                           |                                              |
| For the construction of <i>PHR1</i> -reconstituted strain |                                                 |                                                           |                                              |
| LWH117                                                    | TCACTTATACTCCAGTTAG                             | <i>PHR1</i> gene<br>amplification                         |                                              |
| LWH118                                                    | CACGGCGCGCCTAGCAGCGGAAACTTTGCTGAGTACT<br>TG     |                                                           |                                              |
| LWH119                                                    | GTCAGCGGCCGCATCCCTGCTCATCATCACGAACATTG<br>TCC   | <i>PHR1</i> 3-UTR<br>amplification                        |                                              |
| LWH120                                                    | GGTGTCCCATGCATTAATA                             |                                                           |                                              |
| For the construction of <i>PHR2</i> -reconstituted strain |                                                 |                                                           |                                              |
| LWH121                                                    | ATACCACGACAATAGGAGAG                            | <i>PHR2</i> gene                                          |                                              |

|                                                             |                                                |                                         |
|-------------------------------------------------------------|------------------------------------------------|-----------------------------------------|
| LWH122                                                      | CACGGCGCGCCTAGCAGCGGCACCACTAGTAACATTAG<br>AGT  | amplification                           |
| LWH123                                                      | GTCAGCGGCCGCATCCCTGCAGAGTTGTGGAGACTAGT<br>TG   | <i>PHR2</i> 3-UTR<br>amplification      |
| LWH124                                                      | CTGAGTGAGATGAGGTCATT                           |                                         |
| For the construction of <i>RIM101</i> -reconstituted strain |                                                |                                         |
| LWH129                                                      | TAGTAGGTAGTGTGATGTTG                           | <i>RIM101</i> gene<br>amplification     |
| LWH130                                                      | CACGGCGCGCCTAGCAGCGGCTGTGGAATTGACGCAGT<br>TA   |                                         |
| LWH131                                                      | GTCAGCGGCCGCATCCCTGCTATCGCTGACAAACCAAA<br>TG   | <i>RIM1013</i> -UTR<br>amplification    |
| LWH132                                                      | GTTACTATCTTTCGTCGAT                            |                                         |
| LT391                                                       | CCGCTGCTAGGCGCGCCGTGCCATCATAAAATGTCGAG<br>CGTC | <i>CaSAT1</i> cassette<br>amplification |
| LT392                                                       | GCAGGGATGCGGCCGCTGACTGCAGGACCACCTTTGAT<br>TG   |                                         |
